# Supplementary material
Source: publisher site journal article supplement (https://www.spandidos-publications.com/5230/downloadSupplementary)
Supplement: Supplementary file 1 [file downloadSupplementary]

## Sheet: Sheet1
Table SI. Significantly dysregulated miRNAs between ULMS and myoma samples.
miRNA	ULMS-1	ULMS-2	ULMS-3	ULMS-4	ULMS-5	ULMS-6	Myoma-1	Myoma-2	Myoma-3	ULMS_average	Myoma_average	log2FC	P-value
miR-105-5p	9.06799	180.225	0	204.873	0	3.51719	3.28864	0	0	66.2807	1.09621	5.75763	0.00817906
miR-10a-3p	49.874	336.013	3.84701	145.435	45.5401	26.3789	0	17.0074	9.28236	101.181	8.76324	2.7759	0.0262363
miR-10a-5p	3495.71	35757.9	180.809	19631.2	4329.45	3232.3	542.626	2084.82	1116.98	11104.6	1248.14	2.45235	0.0269044
miR-10b-3p	31.738	91.64	125.669	69.5558	81.6582	240.927	295.978	392.586	422.348	106.865	370.304	-1.9464	0.0242891
miR-10b-5p	3559.19	23026.1	29825.8	18733.3	21697.5	70574.1	60981.3	99335.7	120634	27902.7	93650.2	-1.92938	0.0463123
miR-1185-1-3p	45.34	250.483	0	0	47.1105	19.3445	0	4.25184	0	60.3796	1.41728	4.82139	0.0159853
miR-1197	4.534	39.7107	0	0	29.8366	1.75859	0	0	0	12.64	0	5.64329	0.0169081
miR-1246	997.479	265.756	0	0	14.1331	5.27578	6.57728	2.83456	3.09412	213.774	4.16865	4.94564	0.00836382
miR-126-3p	2276.07	3592.29	2091.49	6287.84	4418.96	1978.42	5587.4	22843.7	10600.5	3440.84	13010.5	-2.26306	0.00179455
miR-126-5p	13.602	64.148	47.4464	112.554	98.932	36.9305	46.041	547.07	205.759	62.2688	266.29	-2.39729	0.012158
miR-1269b	0	39.7107	0	149.229	0	0	0	0	0	31.4899	0	21.1067	1.26423e-11
miR-139-5p	108.816	21.3827	10.2587	51.8507	61.2436	17.5859	207.184	428.018	210.4	45.1896	281.868	-3.05512	0.000131268
miR-146a-5p	4552.13	12185.1	350.078	8347.96	398.869	47.482	989.881	501.717	252.171	4313.6	581.256	2.37614	0.0472163
miR-15b-3p	4.534	27.492	10.2587	17.7051	113.065	8.79297	0	2.83456	1.54706	30.308	1.46054	3.89379	0.0047264
miR-16-2-3p	4.534	18.328	16.6704	88.5256	34.5477	7.03438	0	4.25184	0	28.2733	1.41728	4.17876	0.00373086
miR-181a-2-3p	90.6799	235.209	10.2587	123.936	142.902	24.6203	32.8864	11.3382	13.9235	104.601	19.3827	2.04229	0.0188999
miR-181a-3p	244.836	403.216	2.56467	202.344	28.2663	47.482	16.4432	31.1802	6.18824	154.785	17.9372	2.54756	0.0176104
miR-181a-5p	28555.1	16538	239.797	5637.81	1380.34	3126.78	1624.59	823.44	476.495	9246.3	974.841	2.71062	0.00844377
miR-181b-5p	1663.98	2306.27	35.9054	1711.07	257.537	337.65	157.855	131.807	54.1471	1052.07	114.603	2.69224	0.00428019
miR-182-5p	167.758	497.911	8.97635	5.0586	9.4221	1.75859	16.4432	4.25184	3.09412	115.147	7.92972	3.27333	0.0199827
miR-183-5p	40.806	186.335	1.28234	7.58791	1.57035	1.75859	0	2.83456	1.54706	39.89	1.46054	3.60706	0.0248633
miR-185-5p	3187.4	1032.48	79.5048	446.422	343.906	54.5164	299.266	113.382	35.5824	857.371	149.41	2.09984	0.0471056
miR-186-5p	2942.56	1353.22	1140	1225.45	1176.19	1398.08	2482.92	2321.5	2820.29	1539.25	2541.57	-1.09119	0.0477386
miR-193a-3p	4.534	6.10933	2.56467	1.26465	3.1407	1.75859	16.4432	19.8419	4.64118	3.22866	13.6421	-2.29678	0.0158827
miR-20b-5p	22.67	9.164	1.28234	6.32325	53.3919	66.8266	0	5.66912	0	26.6097	1.88971	3.60547	0.0224122
miR-210-3p	1763.72	803.377	15.388	98.6428	160.176	28.1375	23.0205	75.1158	9.28236	478.241	35.8062	3.0928	0.0111549
miR-21-3p	45.34	113.023	2.56467	44.2628	37.6884	5.27578	6.57728	5.66912	1.54706	41.359	4.59782	2.57155	0.0126871
miR-2682-5p	0	67.2027	0	0	1.57035	21.1031	0	0	0	14.9794	0	5.73579	0.0379326
miR-29a-3p	621.157	1139.39	237.232	706.94	954.772	698.162	2854.54	3866.34	1551.7	726.276	2757.53	-2.21594	0.000122727
miR-29b-3p	140.554	109.968	29.4937	136.582	100.502	47.482	266.38	446.443	54.1471	94.097	255.657	-1.71972	0.0168962
miR-3195	4.534	0	0	0	0	0	26.3091	2.83456	12.3765	0.755666	13.8401	-4.52977	0.0217553
miR-323a-3p	9.06799	436.817	0	0	84.7989	12.3102	0	1.41728	1.54706	90.499	0.988114	5.54072	0.00593498
miR-323b-3p	13.602	119.132	0	0	80.0878	7.03438	0	0	0	36.6427	0	7.13843	0.00179731
miR-324-3p	40.806	6.10933	0	1.26465	3.1407	3.51719	0	0	0	9.13964	0	5.02302	0.0195332
miR-324-5p	81.6119	58.0387	5.12934	16.4405	20.4145	12.3102	9.86592	5.66912	3.09412	32.3242	6.20972	1.89394	0.0352354
miR-337-3p	4.534	70.2573	1.28234	0	94.221	28.1375	3.28864	4.25184	0	33.072	2.51349	3.67323	0.0280276
miR-337-5p	27.204	70.2573	0	0	14.1331	14.0688	3.28864	1.41728	0	20.9439	1.56864	3.57705	0.0425058
miR-34a-5p	58.9419	158.843	11.541	318.692	69.0954	105.516	131.546	1163.59	137.688	120.438	477.607	-2.36909	0.0190425
miR-3605-3p	13.602	24.4373	2.56467	15.1758	3.1407	10.5516	0	2.83456	0	11.5787	0.944853	3.09968	0.0244239
miR-363-3p	462.468	122.187	15.388	74.6144	543.341	1116.71	85.5047	66.6121	15.4706	389.117	55.8625	2.79543	0.0152372
miR-369-3p	18.136	357.396	0	0	662.687	145.963	19.7318	11.3382	0	197.364	10.3567	4.2563	0.029041
miR-369-5p	0	79.4213	0	0	53.3919	15.8273	0	1.41728	0	24.7734	0.472427	5.66674	0.0205493
miR-376a-3p	0	76.3667	0	0	6.2814	12.3102	0	0	0	15.8264	0	5.72059	0.035434
miR-409-5p	27.204	439.872	0	0	370.602	43.9649	19.7318	12.7555	1.54706	146.941	11.3448	3.41319	0.0478891
miR-410-3p	22.67	125.241	1.28234	0	98.932	29.8961	0	1.41728	0	46.337	0.472427	6.59203	0.000774139
miR-412-5p	9.06799	253.537	0	0	75.3768	0	3.28864	1.41728	1.54706	56.3303	2.08433	4.15717	0.0394456
miR-431-5p	45.34	464.309	0	0	62.814	8.79297	0	0	0	96.876	0	8.27081	0.000398622
miR-433-3p	58.9419	384.888	1.28234	0	120.917	42.2063	16.4432	1.41728	0	101.373	5.95349	3.91784	0.02148
miR-485-3p	36.272	174.116	0	1.26465	42.3994	17.5859	6.57728	1.41728	0	45.273	2.66485	3.74182	0.0215313
miR-486-5p	775.313	785.049	21.7997	42.9981	75.3768	1.75859	39.4637	41.1011	7.7353	283.716	29.4334	2.65665	0.0369144
miR-487a-3p	22.67	131.351	0	0	25.1256	14.0688	0	0	0	32.2025	0	6.78133	0.00224041
miR-487b-3p	49.874	409.325	1.28234	1.26465	249.686	42.2063	23.0205	7.0864	0	125.606	10.0356	3.45092	0.0279838
miR-493-5p	86.1459	3124.92	6.41168	7.58791	1491.83	228.617	115.102	24.0938	1.54706	824.253	46.9144	3.91072	0.0102072
miR-503-5p	45.34	12.2187	16.6704	45.5274	34.5477	59.7922	16.4432	7.0864	4.64118	35.6827	9.39026	1.84363	0.0284912
miR-539-3p	0	94.6947	0	0	98.932	31.6547	3.28864	1.41728	0	37.5469	1.56864	4.7358	0.0285212
miR-543	54.408	400.161	2.56467	1.26465	461.683	128.377	16.4432	14.1728	0	174.743	10.2053	3.99458	0.00945506
miR-548e-3p	13.602	12.2187	6.41168	16.4405	7.85175	7.03438	0	2.83456	0	10.5932	0.944853	3.0664	0.0168927
miR-615-3p	122.418	183.28	0	236.49	0	1.75859	0	0	0	90.6577	0	8.31238	0.00041136
miR-629-5p	362.72	152.733	3.84701	5.0586	9.4221	3.51719	16.4432	0	1.54706	89.5496	5.99675	3.4287	0.0264789
miR-708-5p	1047.35	88.5853	8.97635	5.0586	23.5552	112.55	42.7523	11.3382	12.3765	214.346	22.1557	2.80612	0.0341925
miR-758-3p	22.67	381.833	1.28234	0	72.2361	14.0688	6.57728	1.41728	0	82.0151	2.66485	4.5414	0.00941579
miR-7706	63.4759	149.679	12.8234	168.199	37.6884	22.8617	29.5978	17.0074	7.7353	75.7878	18.1135	1.68152	0.0434816
miR-889-3p	4.534	586.496	2.56467	0	664.258	73.861	6.57728	18.4246	0	221.952	8.33397	4.48954	0.0146428
miR-92b-3p	226.7	320.74	193.633	523.566	207.286	124.86	49.3296	62.3603	88.1825	266.131	66.6241	1.57174	0.0183361
The log2FC and P-values for each miRNA were calculated by the Wald test in DESeq2. FC, fold change; miRNA/miR, microRNA; ULMS, ULMS, uterine leiomyosarcoma.
